# Supplementary material for: Induction of apoptosis by directing oncogenic Bcr-Abl into the nucleus
Source: PubMed Central journal article supplement (PMC3926824; doi:10.18632/oncotarget.1339), 2013-10-09
Supplement: oncotarget-04-2249-s001.pdf [file oncotarget-04-2249-s001.pdf]

## Induction of apoptosis by directing oncogenic Bcr-Abl into the nucleus - Huang et al

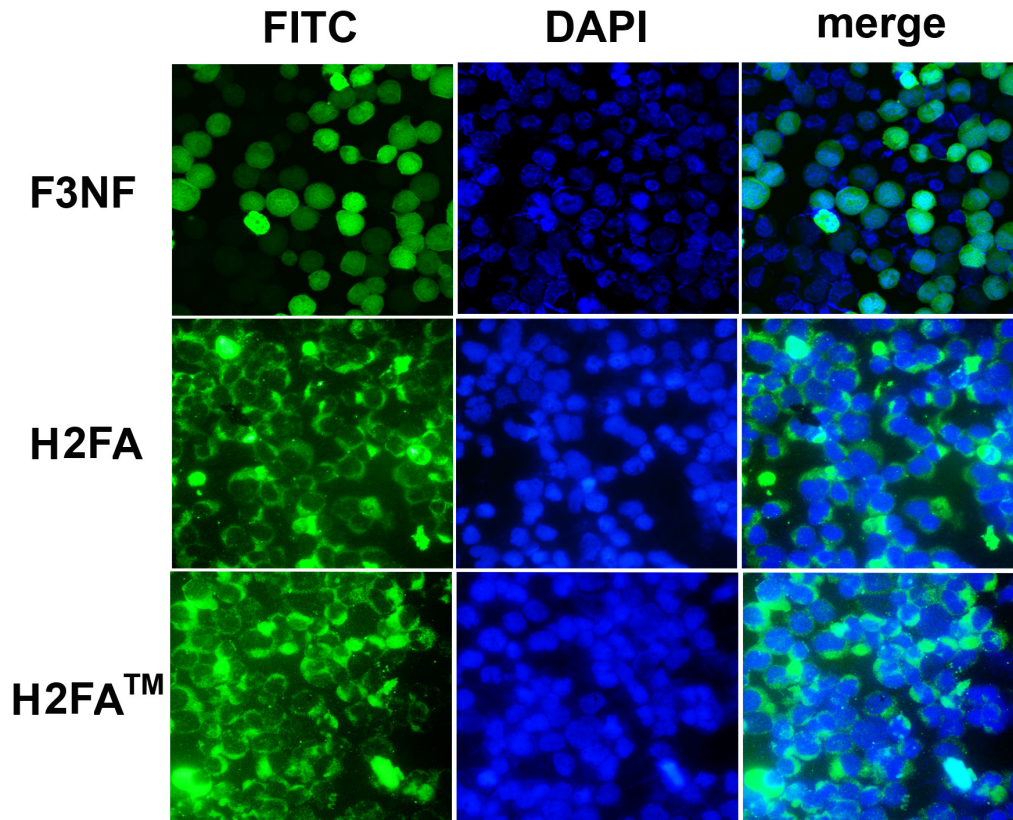

Supplemental figure 1: The subcellular localization of F3NF, H2FA and H2FATM was observed by immunofluorescent assay.

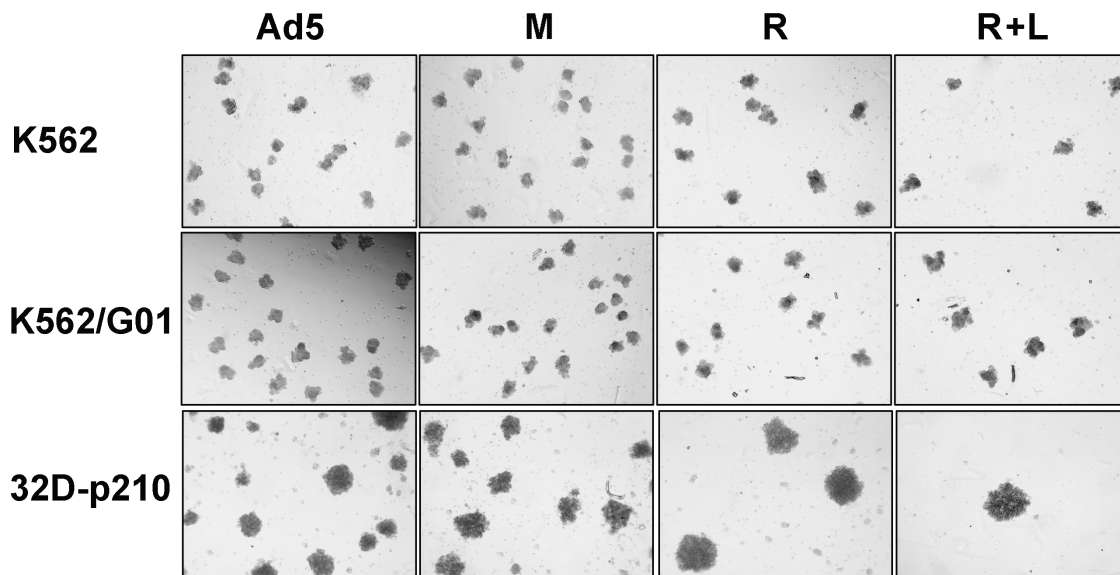

Supplemental figure 2: The result of methylcellulose colony-forming assay.

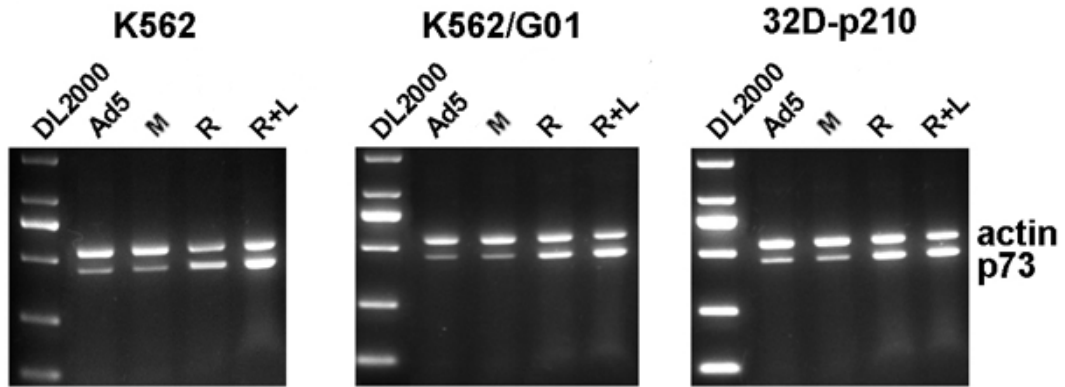

Supplemental figure 3: The mRNA level of p73 was detected by RT-PCR.

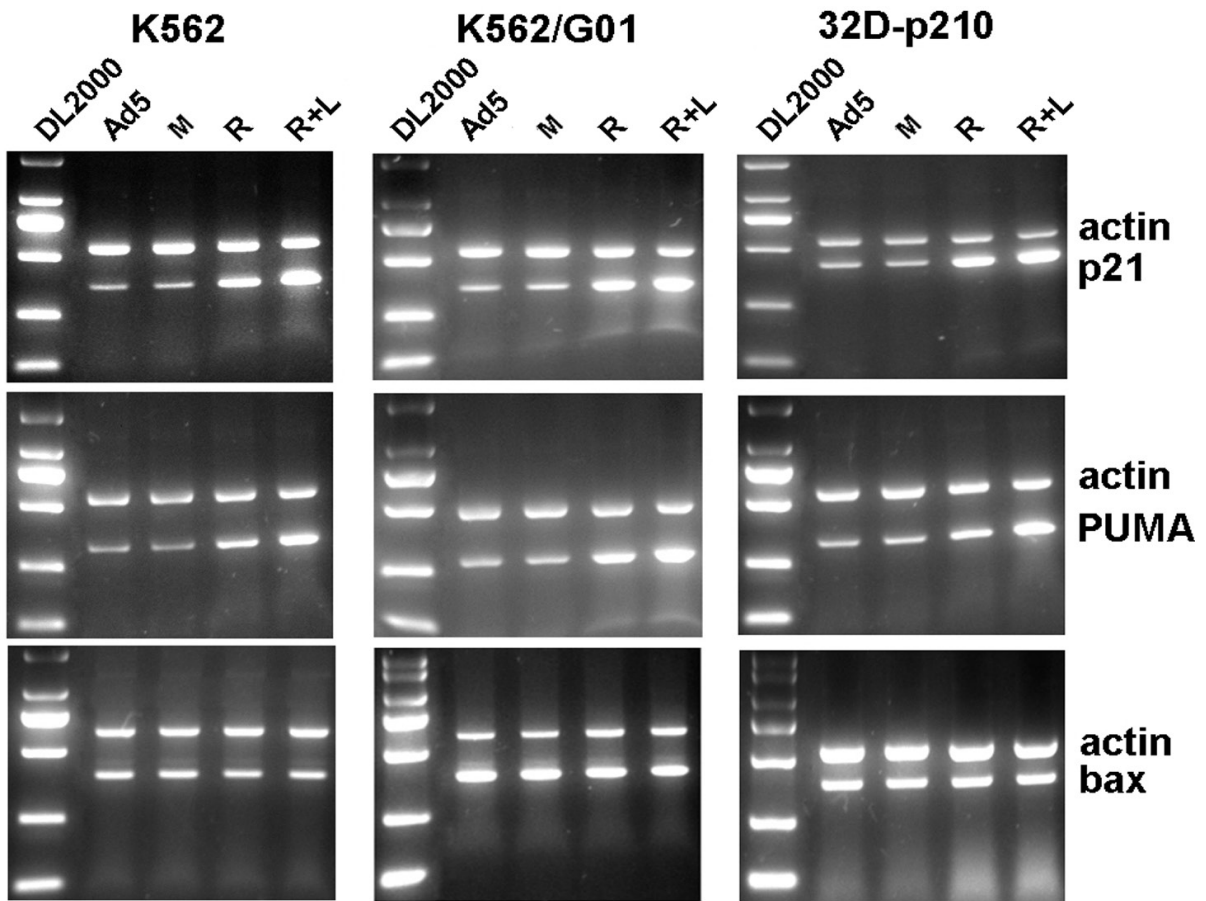

Supplemental figure 4: The mRNA level of p21, PUMA and Bax was analyzed by RT-PCR.

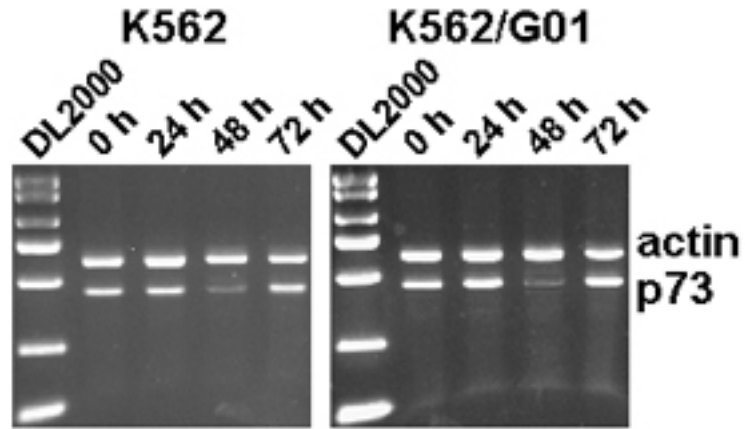

Supplemental figure 5: The maximum inhibitory effect of siRNA on p73 was detected by RT-PCR.

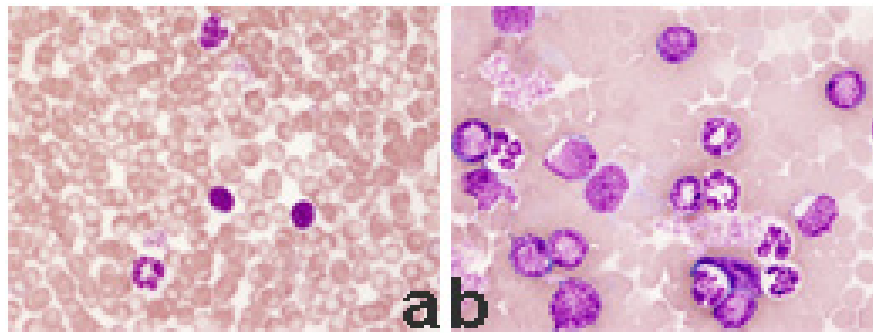

Supplemental figure 6: Wright's staining of peripheral blood smears of mice. (a) normal peripheral blood smear, (b) peripheral blood smear from morbid mouse.
